# Supplementary material for: Live imaging of excitable axonal microdomains in ankyrin-G-GFP mice
Source: PubMed Central journal article supplement — bioRxiv. 2024 Jun 19:2023.02.01.525891. Preprint. [Version 2] doi: 10.1101/2023.02.01.525891 (PMC11212890; doi:10.1101/2023.02.01.525891), 2024-06-19
Supplement: media-1.pdf [file media-1.pdf]

# Supplementary Material

*for*

## Live imaging of excitable axonal microdomains in ankyrin-G-GFP mice

**Christian Thome<sup>1,2,3</sup>, Jan Maximilian Janssen<sup>1,2,4</sup>, Seda Karabulut<sup>4</sup>, Claudio Acuna<sup>5</sup>, Elisa D'Este<sup>6</sup>, Stella J. Soyka<sup>7</sup>, Konrad Baum<sup>1,2</sup>, Michael Bock<sup>4</sup>, Nadja Lehmann<sup>4</sup>, Johannes Roos<sup>1,2,4</sup>, Nikolas A. Stevens<sup>3</sup>, Masashi Hasegawa<sup>8</sup>, Dan A. Ganea<sup>9</sup>, Chloé M. Benoit<sup>8,9</sup>, Jan Gründemann<sup>8,9</sup>, Lia Min<sup>10</sup>, Kalynn M. Bird<sup>10</sup>, Christian Schultz<sup>4</sup>, Vann Bennett<sup>11</sup>, Paul M. Jenkins<sup>10\*</sup>, Maren Engelhardt<sup>1,2,4\*§</sup>**

<sup>1</sup>Institute of Anatomy and Cell Biology, Johannes Kepler University, 4020 Linz, Austria

<sup>2</sup>Clinical Research Institute of Neuroscience, Johannes Kepler University, 4020 Linz, Austria

<sup>3</sup>Institute of Physiology and Pathophysiology, Heidelberg University, 69120 Heidelberg, Germany

<sup>4</sup>Institute of Neuroanatomy, Mannheim Center for Translational Neuroscience (MCTN), Medical Faculty Mannheim, Heidelberg University, 68167 Mannheim, Germany

<sup>5</sup>Chica and Heinz Schaller Research Group, Institute of Anatomy and Cell Biology, Heidelberg University, 69120 Heidelberg, Germany

<sup>6</sup>Optical Microscopy Facility, Max Planck Institute for Medical Research, 69120 Heidelberg, Germany

<sup>7</sup>Institute of Anatomy and Cell Biology, Dept. of Functional Neuroanatomy, Heidelberg University, 69120 Heidelberg, Germany

<sup>8</sup>German Center for Neurodegenerative Disease (DZNE), Neural Circuit Computations, 53127 Bonn, Germany

<sup>9</sup>University of Basel, Department of Biomedicine, 4031 Basel, Switzerland

<sup>10</sup>Departments of Pharmacology and Psychiatry, University of Michigan Medical School, Ann Arbor, MI 48109, USA

<sup>11</sup>Department of Biochemistry, Duke University Medical Center, Durham, NC 27710, USA

\* These authors contributed equally. § Corresponding author: [maren.engelhardt@jku.at](mailto:maren.engelhardt@jku.at)

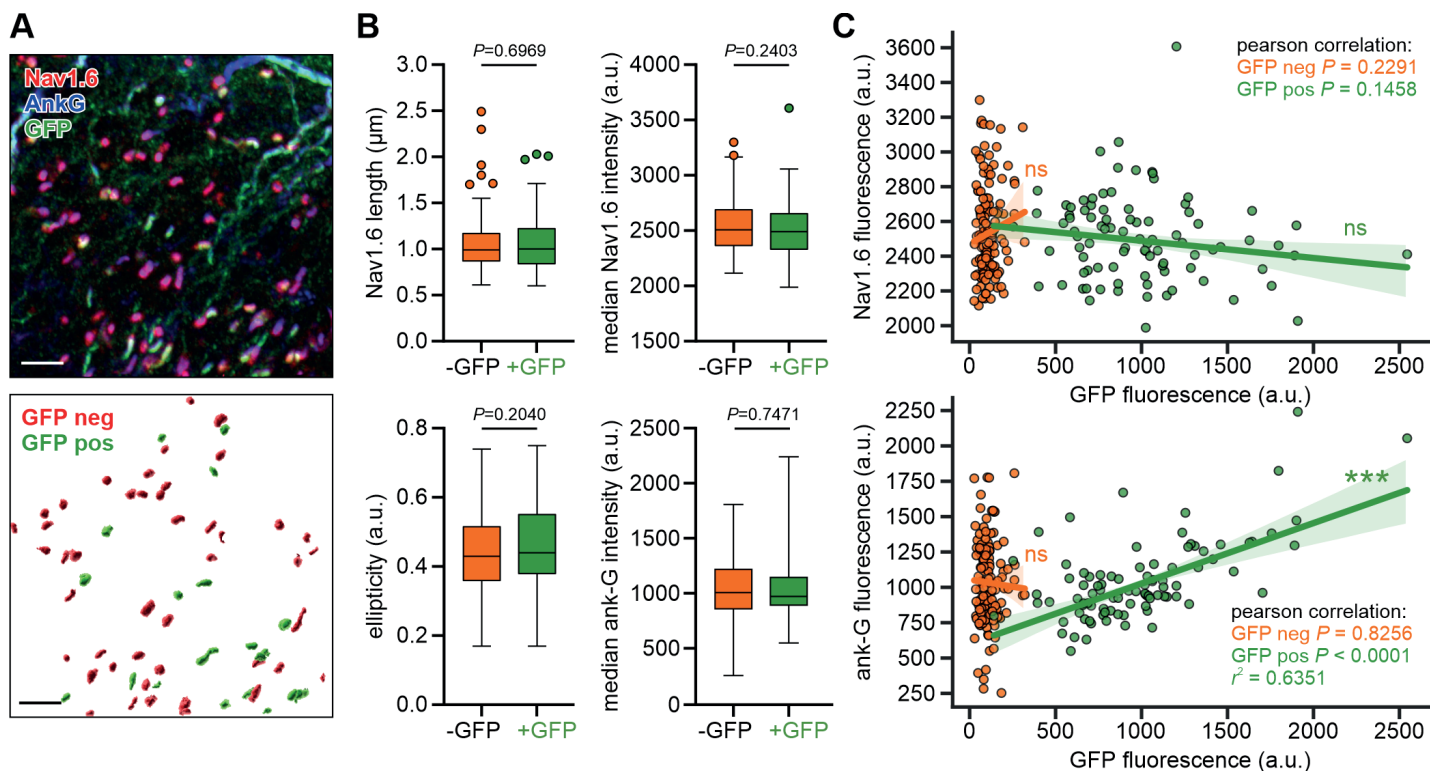

**Supplementary Figure S1: Ank-G-GFP activation and expression in nodes of Ranvier do not alter node morphology**

**A** Top panel shows a cryosection of neocortical white matter from an ankyrin-G-GFP x CaMKIIa-Cre mouse, with GFP<sup>+</sup> and GFP<sup>-</sup> nodes of Ranvier (noR; see Fig. 3A for details). The bottom panel shows an automated 3D reconstruction of noR using Imaris. Nodes were identified via the ankyrin-G channel, classified by the GFP channel, and properties were analyzed in Na<sub>v</sub>1.6 and ankyrin-G channels. All steps were automated within the Imaris software. Scale bar = 5 µm. **B** Nodes that are GFP<sup>+</sup> and GFP<sup>-</sup> show no differences regarding their length, ellipticity, and median fluorescence intensity of ankyrin-G or Na<sub>v</sub>1.6 signals ( $n = 141$  GFP<sup>-</sup> nodes, 91 GFP<sup>+</sup> nodes, 1 animal, Mann-Whitney U test). **C** *Top panel*: The fluorescence intensity of the sodium channel Na<sub>v</sub>1.6 did not correlate with ankyrin-G-GFP fluorescence intensity, indicating unchanged levels of sodium channels. *Bottom panel*: The intensity of GFP fluorescence correlates positively with the levels of all ankyrin-G in GFP<sup>+</sup> but not GFP<sup>-</sup> nodes ( $n$  as in B; Pearson correlation details in the graph). This demonstrates that ankyrin-G-GFP does not change the Na<sub>v</sub>1.6 channel fluorescence intensity and provides a reliable predictor of ankyrin-G levels, though we do not exclude the possibility that native unlabeled ankyrin-G remains in the nodes to some degree.

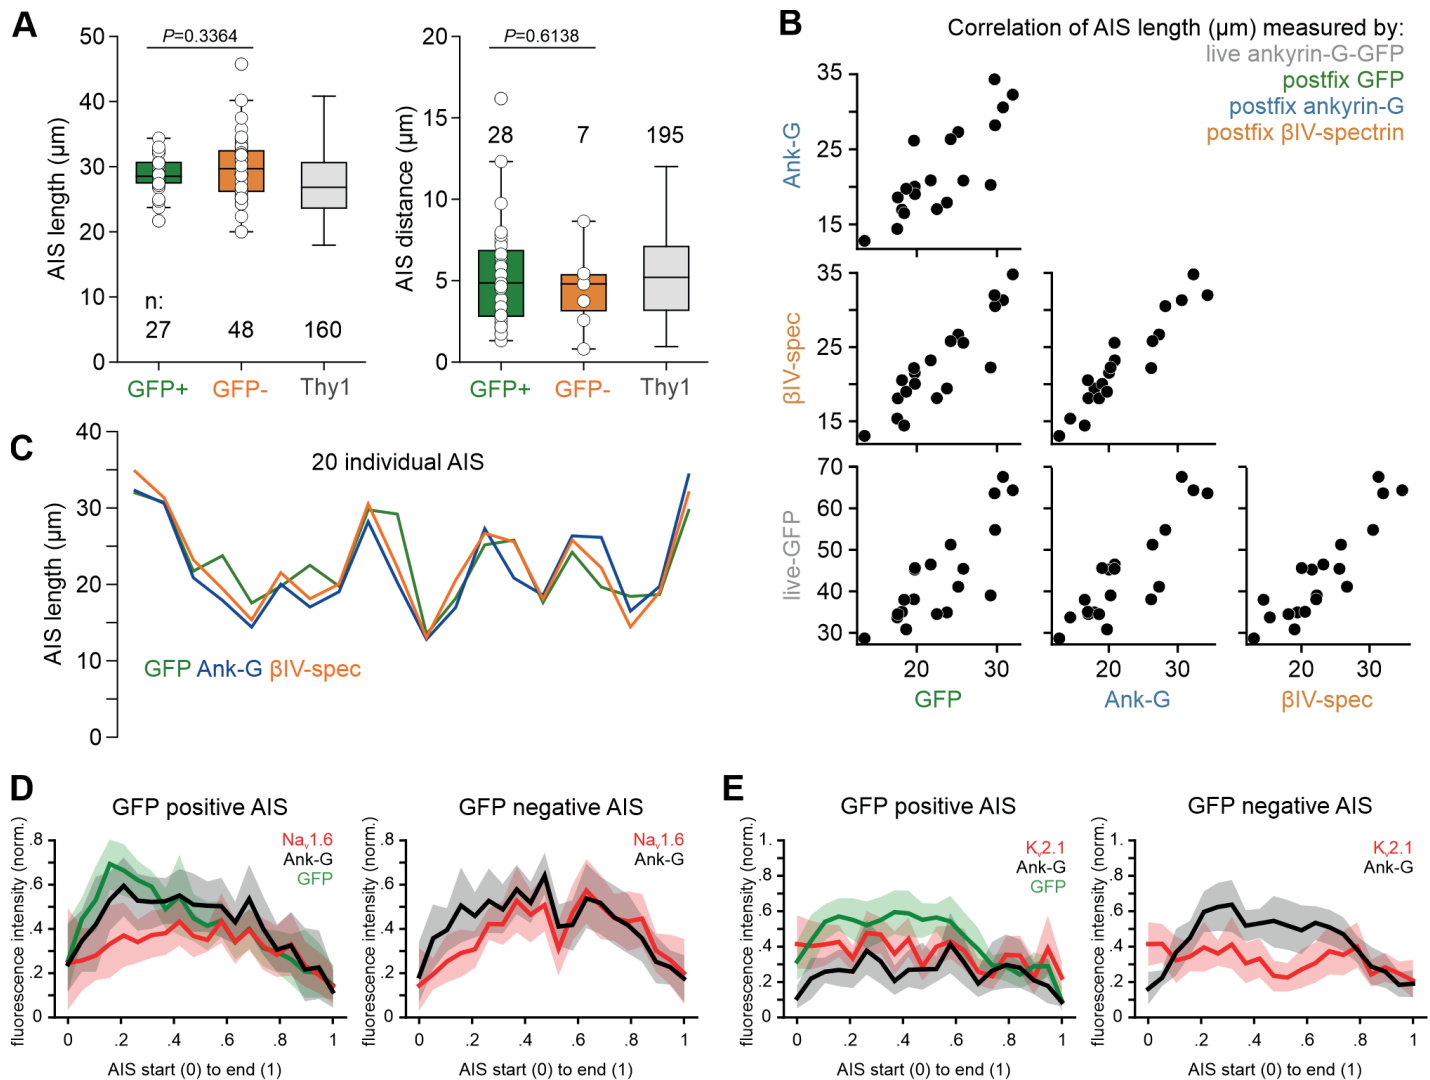

### Supplementary Figure S2: AIS length, position, and molecular composition remains intact after ankyrin-G-GFP expression

**A** Measurements of length and position of AIS in CA1 pyramidal neurons that are either GFP positive (green) or negative (orange). The inclusion of GFP into the ankyrin-G gene does not significantly change AIS length (*left* panel) or distance to the soma (*right* panel). Sample preparation was conducted as outlined in Fig. 7 and AIS measurements were based on the  $\beta\text{IV-spectrin}$  signal ( $n = 3$  animals). An independent Thy1-GFP control line (grey,  $n = 3$  animals) was used as an additional control. The number of individual AIS (white circles) and  $P$  values are given within the graph ( $t$ -test for AIS length; Mann – Whitney U-test for AIS distance). **B** Correlation of AIS length measured live via the ankyrin-G-GFP signal in a patch clamp chamber (grey) and post-fixation using antibodies against GFP, ankyrin-G, and  $\beta\text{IV-spectrin}$  in CA1 pyramidal neurons (sample preparation as in Fig. 7,  $n = 20$  AIS, 1 animal). **C** Alternative visualization of data from panel B (post-fixation). Measurements for AIS signals using antibodies against GFP, ankyrin-G, and  $\beta\text{IV-spectrin}$  show comparable lengths. **D** Immunosignals from Na<sub>v</sub>1.6 channels retain their fluorescence intensity across the AIS after the expression of ankyrin-G-GFP. AIS length was normalized from start to end of the ankyrin-G signal and fluorescence intensity from lowest to highest. Tissue preparation as described in Fig. 4A ( $n = 10$  GFP<sup>+</sup> and 10 GFP<sup>-</sup> AIS). **E** Line plots of K<sub>v</sub>2.1 and GFP fluorescence intensities along the AIS signal indicate no change in K<sub>v</sub>2.1 expression. Normalization as in panel D. Tissue preparation as described in Fig. 4B ( $n = 10$  GFP<sup>+</sup> and 10 GFP<sup>-</sup> AIS).

**Supplementary Table 1** Summary of statistics for passive and active properties (related to Fig. 7)

| stats           | wildtype |        |        |       | AnkG-GFP |        |        |       | AnkG-GFP+Cre |        |        |       | ANOVA         |                |
|-----------------|----------|--------|--------|-------|----------|--------|--------|-------|--------------|--------|--------|-------|---------------|----------------|
|                 | N        | mean   | median | SD    | N        | mean   | median | SD    | N            | mean   | median | SD    | p(A) / p(KW)  | ttest / M-Whit |
| RMP             | 28       | -63.29 | -63.56 | 3.78  | 22       | -62.57 | -63.43 | 4.62  | 42           | -64.14 | -63.32 | 4.17  | 0.3441        | 0.1733         |
| Rinput          | 28       | 268.60 | 251.50 | 95.51 | 23       | 226.10 | 203.70 | 89.55 | 42           | 253.00 | 234.40 | 95.75 | <u>0.0952</u> | <u>0.1634</u>  |
| lh sag          | 28       | 22.25  | 22.01  | 8.67  | 23       | 22.84  | 23.30  | 8.64  | 42           | 25.06  | 28.05  | 9.91  | <u>0.2529</u> | <u>0.3469</u>  |
| rheobase        | 28       | 52.16  | 44.86  | 30.90 | 23       | 70.86  | 69.81  | 36.43 | 41           | 69.31  | 69.81  | 37.54 | <u>0.0654</u> | <u>0.9917</u>  |
| ISI (ratio 1/6) | 27       | 2.55   | 2.32   | 1.00  | 22       | 2.39   | 2.11   | 0.68  | 42           | 1.98   | 1.86   | 0.47  | <u>0.0038</u> | <u>0.0123</u>  |
| maxAP           | 27       | 12.04  | 11.00  | 2.59  | 22       | 9.77   | 10.00  | 2.05  | 42           | 10.52  | 10.00  | 2.48  | <u>0.0044</u> | 0.2278         |
| lhalfmaxAP      | 27       | 102.40 | 96.82  | 39.97 | 22       | 122.20 | 120.10 | 32.56 | 42           | 122.90 | 116.30 | 46.33 | <u>0.0576</u> | <u>0.6471</u>  |
| AP thesh        | 28       | -39.00 | -38.45 | 2.75  | 23       | -38.30 | -38.70 | 3.75  | 42           | -36.91 | -36.54 | 3.41  | <u>0.0163</u> | <u>0.0457</u>  |
| AP amp.         | 28       | 84.98  | 86.78  | 10.90 | 23       | 88.85  | 90.03  | 7.73  | 42           | 90.29  | 91.51  | 6.92  | <u>0.0396</u> | <u>0.4537</u>  |
| AP hw           | 28       | 2.05   | 2.04   | 0.26  | 23       | 1.91   | 1.88   | 0.21  | 42           | 1.94   | 1.91   | 0.21  | <u>0.0546</u> | <u>0.5371</u>  |
| AP rise         | 28       | 0.54   | 0.54   | 0.12  | 23       | 0.50   | 0.49   | 0.07  | 42           | 0.46   | 0.45   | 0.08  | <u>0.0013</u> | <u>0.0103</u>  |
| AP decay        | 28       | 2.19   | 2.19   | 0.41  | 23       | 2.07   | 2.03   | 0.31  | 42           | 2.19   | 2.20   | 0.27  | <u>0.2392</u> | 0.1174         |
| EPSP amp.       | 27       | 0.59   | 0.59   | 0.08  | 22       | 0.59   | 0.59   | 0.10  | 42           | 0.61   | 0.58   | 0.12  | <u>0.8246</u> | <u>0.5555</u>  |
| EPSP frequ.     | 27       | 0.47   | 0.31   | 0.61  | 22       | 0.49   | 0.32   | 0.50  | 42           | 0.40   | 0.25   | 0.41  | <u>0.6986</u> | <u>0.3858</u>  |

|                       |                 |                                                  |
|-----------------------|-----------------|--------------------------------------------------|
| multiple comparisons: | ISI (ratio 1/6) | Ank-G-GFP+Cre is different from both others      |
| significant pairs:    | maxAP           | wildtype is different from both Ank-G-GFP groups |
|                       | AP thesh        | wildtype vs. ankG-GFP+Cre                        |
|                       | AP amp.         | wildtype is different to ankG-GFP+Cre            |
|                       | AP rise         | wildtype vs ankG-GFP+Cre                         |

**Supplementary Table 2** Summary of Cre viruses and Cre driver lines

| Neuron population                           | Cre virus / line                                                                                             | Common name                                                            | Source, strain                                                   |
|---------------------------------------------|--------------------------------------------------------------------------------------------------------------|------------------------------------------------------------------------|------------------------------------------------------------------|
| Unspecific                                  | FUW-nGFP::Cre (lentiviral vector), CMV promotor                                                              | nGFP-Cre, NA                                                           | Gift from the Südhof lab, Stanford University, CA, USA           |
| Unspecific                                  | FUW-nGFP:: ΔCre (lentiviral vector), CMV promotor                                                            | nGFP-ΔCre, NA                                                          | Gift from the Südhof lab, Stanford University, CA, USA           |
| Excitatory neurons                          | pENN.AAV.CamKII 0.4.Cre.SV40                                                                                 | CaMKII-Cre                                                             | Addgene viral prep #105558-AAV5, Lot: v7050                      |
| Neurons (unspecific)                        | ENN.AAV.hSyn.Cre.WPRE.hGH                                                                                    | Synapsin-Cre                                                           | Addgene viral prep #105553-AAV1, Lot: v75882                     |
| Inhibitory neurons                          | AAV1-hDlx-Flex-dTomato-Fishell_7                                                                             | hDlx-tdTomato                                                          | Addgene viral prep #83894-AAV1                                   |
| Neurons (unspecific)                        | pAAV-hSyn-Cre-P2A-dTomato                                                                                    | Synapsin-Cre-tdTomato                                                  | Addgene viral prep 107738-AAVrg, Lot: v75881                     |
| Excitatory neurons                          | B6.Cg-Tg(Camk2a-Cre)T29-1Stl/J                                                                               | T29-1<br>IMSR_JAX:005359                                               | The Jackson Laboratory<br>Strain # 005359                        |
| Parvalbumin-pos. interneurons with tdTomato | B6;129P2-Pvalb <sup>tm1(Cre)Arbr/J</sup> crossed with B6.Cg-GT(ROSA)26Sor <sup>tm14(CAG-tdTomato)Hze/J</sup> | B6 PV <sup>Cre</sup><br>IMSR_JAX:017320<br><br>Ai14<br>IMSR_JAX:007914 | The Jackson Laboratory<br>Strain # 017320<br><br>Strain # 007914 |
| Unspecific                                  | AAV-retro/2-hSyn1-mCherry-iCre-WRPE-hGHP(A)                                                                  | Retro-mCherry-Cre                                                      | University of Zürich, Viral Vector Facility, v230                |

**Supplementary Table 3** Specification of primary and secondary antibodies (catalog number, working dilution, previously conducted controls, sources, Research Resource Identification Portal (RRID) code and references where available).

| Primary Antibody<br>Clone/type                           | Dilution | Reported controls |    |    |    | Source & Catalog Number<br>RRID or other reference                          |
|----------------------------------------------------------|----------|-------------------|----|----|----|-----------------------------------------------------------------------------|
|                                                          |          | KO                | IF | IP | WB |                                                                             |
| <i>Ankyrin-G</i> (rb)                                    | 1:500    |                   | X  |    | X  | Santa Cruz Biotechnology, Heidelberg, Germany; sc-28561<br>AB_633909        |
| <i>Ankyrin-G</i> (gp)                                    | 1:1000   |                   | X  |    | X  | Synaptic Systems, Göttingen, Germany<br>386 005<br>[1]                      |
| <i>Ankyrin-G</i> (ms)<br>N106/36                         | 1:500    | X                 | X  |    | X  | UC Davis/NIH NeuroMab Facility, CA, USA; 73-146<br>AB_2315803               |
| <i>ank-G C-terminus</i>                                  | 1:200    |                   | X  |    |    | Santa Cruz Biotechnology, Heidelberg, Germany; sc-28561; discontinued       |
| <i>βIV-spectrin</i> (rb)                                 | 1:1000   | X                 | X  |    | X  | Self-made<br>[2-4]                                                          |
| <i>Caspr</i> (ms)<br>K65/35                              | 1:500    | X                 | X  | X  | X  | UC Davis/NIH NeuroMab Facility, CA, USA; 75-001<br>AB_2083496               |
| <i>FGF14</i> (ms)<br>N56/21                              | 1:500    | X                 | X  | X  | X  | UC Davis/NIH NeuroMab Facility, CA, USA; 75-096<br>AB_2104060               |
| <i>GFP</i> (ch)                                          | 1:1000   |                   | X  |    |    | Acris Antibodies GmbH, Hiddenhausen, Germany;<br>AP20142PU-N<br>AB_10756183 |
| <i>Iba1</i> (rb)                                         | 1:2000   |                   | X  |    |    | Wako, Neuss, Germany; 019-19741<br>AB_839504                                |
| <i>Kv1.2</i> (ms)<br>K14/16                              | 1:200    | X                 | X  | X  | X  | UC Davis/NIH NeuroMab Facility, CA, USA; 73-008<br>AB_2296313               |
| <i>Kv2.1</i> (ms)<br>K89/34                              | 1:1000   | X                 | X  |    | X  | UC Davis/NIH NeuroMab Facility, CA, USA; 75-014-020<br>AB_2877280           |
| <i>Nav1.6</i> (rb)                                       | 1:2000   |                   | X  |    | X  | Alomone Labs, Jerusalem, Israel<br>ASC-009<br>AB_2040202                    |
| <i>NeuN</i> (ms)<br>A60                                  | 1:500    |                   | X  |    | X  | Millipore, Temecula, CA, USA; MAB377<br>AB_2314889                          |
| <i>NeuN</i> (gp)                                         | 1:2000   |                   | X  |    |    | Synaptic Systems, Göttingen, Germany 266 004<br>AB_2619988                  |
| <i>Parvalbumin</i> (rb)                                  | 1:500    |                   | X  |    | X  | Swant Inc., Marly, Switzerland<br>PV27<br>AB_2631173                        |
| <i>Synaptopodin</i> (gp)                                 | 1:500    |                   | X  |    | X  | Synaptic Systems, Göttingen, Germany 163 004<br>AB_10549419                 |
| <i>TRIM46</i> (ms)<br><i>SMP14</i><br>(aka <i>MDM2</i> ) | 1:500    |                   | X  |    | X  | Santa Cruz Biotechnology, Heidelberg, Germany; sc-965<br>AB_627920          |
| <i>vGAT</i> (ch)                                         | 1:1000   |                   | X  |    |    | Synaptic Systems, Göttingen, Germany 131 006<br>AB_2619820                  |

KO absence of immunosignal in knock out animals, IF immunofluorescence, IP immuno-precipitation, WB western blot, rb rabbit, ms mouse, gp guinea pig, ch chicken

**Supplementary Table 3 (continued)** Specification of primary and secondary antibodies (catalog number, working dilution, previously conducted controls, sources, Research Resource Identification Portal (RRID) code and references where available).

| Secondary Antibody<br>Clone/type              | Dilution | Reported controls |    |    |    | Source & Catalog Number<br>RRID or other reference                         |
|-----------------------------------------------|----------|-------------------|----|----|----|----------------------------------------------------------------------------|
|                                               |          | KO                | IF | IP | WB |                                                                            |
| <i>FluoTag-X4-anti GFP-StarRED</i><br>1H1/1B2 | 1:500    |                   |    |    |    | NanoTag Technologies, Göttingen, Germany; N0304<br>AB_2744631              |
| <i>gt anti mouse abberior STAR 580</i>        | 1:100    |                   |    |    |    | Abberior GmbH, Göttingen, Germany; ST580-1001<br>AB_2923543                |
| <i>gt anti rabbit abberior STAR 580</i>       | 1:100    |                   |    |    |    | Abberior GmbH, Göttingen, Germany; ST580-1002<br>AB_2910107                |
| <i>gt anti ch Alexa Fluor 488</i>             | 1:1000   |                   |    |    |    | Molecular Probes, Thermo Fisher, Karlsruhe, Germany; A-11039<br>AB_42924   |
| <i>gt anti ms Alexa Fluor 568</i>             | 1:1000   |                   |    |    |    | Molecular Probes, Thermo Fisher, Karlsruhe, Germany; A-11004<br>AB_143162  |
| <i>gt anti rb Alexa Fluor 568</i>             | 1:1000   |                   |    |    |    | Molecular Probes, Thermo Fisher, Karlsruhe, Germany; A-21069<br>AB_141416  |
| <i>gt anti gp Alexa Fluor 568</i>             | 1:1000   |                   |    |    |    | Molecular Probes, Thermo Fisher, Karlsruhe, Germany; A-11075<br>AB_141954  |
| <i>gt anti ch Alexa Fluor 568</i>             | 1:1000   |                   |    |    |    | Molecular Probes, Thermo Fisher, Karlsruhe, Germany; A-11041<br>AB_2534098 |
| <i>gt anti ms Alexa Fluor 594</i>             | 1:500    |                   |    |    |    | Molecular Probes, Thermo Fisher, Karlsruhe, Germany; A-21125<br>AB_141593  |
| <i>gt anti rb Alexa Fluor 594</i>             | 1:500    |                   |    |    |    | Molecular Probes, Thermo Fisher, Karlsruhe, Germany; A-11012<br>AB_141359  |
| <i>gt anti ms Alexa Fluor 647</i>             | 1:500    |                   |    |    |    | Molecular Probes, Thermo Fisher, Karlsruhe, Germany; A<br>AB_2535804-21235 |
| <i>gt anti rb Alexa Fluor 647</i>             | 1:500    |                   |    |    |    | Molecular Probes, Thermo Fisher, Karlsruhe, Germany; A-21244<br>AB_2535812 |
| <i>gt anti gp Alexa Fluor 647</i>             | 1:500    |                   |    |    |    | Molecular Probes, Thermo Fisher, Karlsruhe, Germany; A-21450<br>AB_2735091 |
| <i>gt anti ch Alexa Fluor 647</i>             | 1:500    |                   |    |    |    | Molecular Probes, Thermo Fisher, Karlsruhe, Germany; A-21449<br>AB_2535866 |
| <i>Alexa Streptavidin 568</i>                 | 1:1000   |                   |    |    |    | Molecular Probes, Thermo Fisher, Karlsruhe, Germany; S11226<br>AB_2315774  |

KO absence of immunosignal in knock out animals, IF immunofluorescence, IP immuno-precipitation, WB western blot, rb rabbit, ms mouse, gp guinea pig, ch chicken

**Supplementary Table 4** Summary of fixation and blocking reagents for all immunofluorescence experiments.

| <b>Sample</b>                | <b>Fixation Time / DIV</b>                                                        | <b>Post Fix</b> | <b>Blocking buffer</b><br><b>Incubation buffer</b>                                                                                                                              |
|------------------------------|-----------------------------------------------------------------------------------|-----------------|---------------------------------------------------------------------------------------------------------------------------------------------------------------------------------|
| Isolated hippocampal neurons | 4% PFA, 15 min<br>DIV 19                                                          | No              | <b>B:</b> 1% BSA in PBS. Prior to blocking, quench in PBS with 100 mM glycine, 100 mM ammonium chloride (5 min) and application of 0.1% Triton X-100 for 5 min<br><b>I:</b> PBS |
| Hippocampal OTC              | 4% PFA, 30 min                                                                    | No              | <b>B:</b> 0.1% Triton X-100, 1% BSA, 0.2% fish skin gelatine, in 1 x PBS<br><b>I:</b> same                                                                                      |
| <i>Ex vivo</i> acute slices  | 2% PFA, 90 min                                                                    | No              | <b>B:</b> 0.3% Triton X-100, 5% normal goat serum in 1 x PBS<br><b>I:</b> 0.2% Triton X-100, 1% normal goat serum in 1 x PBS                                                    |
| Whole mount retina           | 4% PFA, 15 min<br>>P55                                                            | No              | <b>B:</b> 0.5% Triton X-100, 0.2% BSA, 0.02% sodium azide in 1x PBS<br><b>I:</b> 1% Triton X-100, 10% FCS and 0.02% sodium azide in 1x PBS                                      |
| Cryosections                 | Perfusion, 15 min<br>2% PFA (for ion channels)<br>4% PFA (for all others)<br>>P28 | No              | <b>B:</b> 1% BSA, 0.2% fish skin gelatine, 0.1% Triton X-100 in 1 x PBS<br><b>I:</b> same                                                                                       |

*PFA* paraformaldehyde, *min* minutes, *DIV* days in vitro, *BSA* bovine serum albumin, *PBS* phosphate buffered saline, *FCS* fetal calf serum

#### References for Supplements

- Schlüter, A., et al., Dynamic regulation of synaptopodin and the axon initial segment in retinal ganglion cells during postnatal development *Frontiers Cell Neurosci*, 2019.
- Gutzmann, A., et al., A period of structural plasticity at the axon initial segment in developing visual cortex. *Front Neuroanat*, 2014. 8: p. 11.
- Freal, A., et al., Cooperative Interactions between 480 kDa Ankyrin-G and EB Proteins Assemble the Axon Initial Segment. *J Neurosci*, 2016. 36(16): p. 4421-33.
- Höflin, F., et al., Heterogeneity of the Axon Initial Segment in Interneurons and Pyramidal Cells of Rodent Visual Cortex. *Front Cell Neurosci*, 2017. 11: p. 332.
